# Supplementary material for: An “all-in-one” strategy based on the organic molecule DCN-4CQA for effective NIR-fluorescence-imaging-guided dual phototherapy
Source: Royal Society of Chemistry journal article supplement (doi:10.1039/d1tb00949d), 2021-01-01
Supplement: d1tb00949d1.pdf [file d1tb00949d1.pdf]

## Supporting Information

### **"All-in-One" Strategy Based on Organic Molecule DCN-4CQA for Effective NIR Fluorescence Imaging guided Dual Phototherapy**

Lu Li,<sup>a</sup> Yanjie Liu,<sup>a</sup> Tiedong Sun,<sup>a</sup> Tianlei Zhou,<sup>b</sup> Yinshuai Bai,<sup>d</sup> Xiangzhen Liu,<sup>d</sup> Shiyong  
Zhang,<sup>d</sup> Tao Jia,<sup>\*a</sup> Xiuhua Zhao<sup>\*a</sup> and Yue Wang<sup>c</sup>

a Key Laboratory of Forest Plant Ecology, Ministry of Education, Engineering Research Center  
of Forest Bio-Preparation, College of Chemistry, Chemical Engineering and Resource  
Utilization, Northeast Forestry University, 26 Hexing Road, Harbin 150040, P. R. China

b Kaneka US Material Research Center (KMR) Kaneka Americas Holding, Inc. 34801 Campus  
Dr., Fremont, CA, 94555 (USA)

c State Key Laboratory of Supramolecular Structure and Materials, College of Chemistry, Jilin  
University, Qianjin Street, Changchun 130012, P. R. China

d Technology Center for China Tobacco Henan Industrial Limited Company, Zhengzhou, Henan,  
450000, P.R. China

\*Email: jiaatopolychem@nefu.edu.cn, xiuhuazhao@nefu.edu.cn.

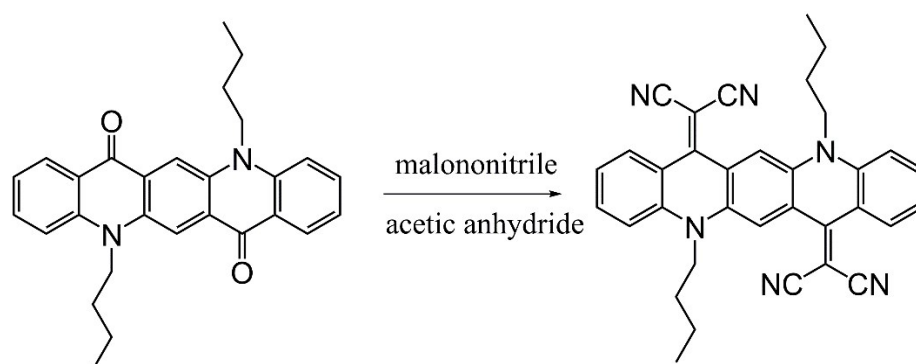

**Scheme 1.** The synthesis route of DCN-4CQA

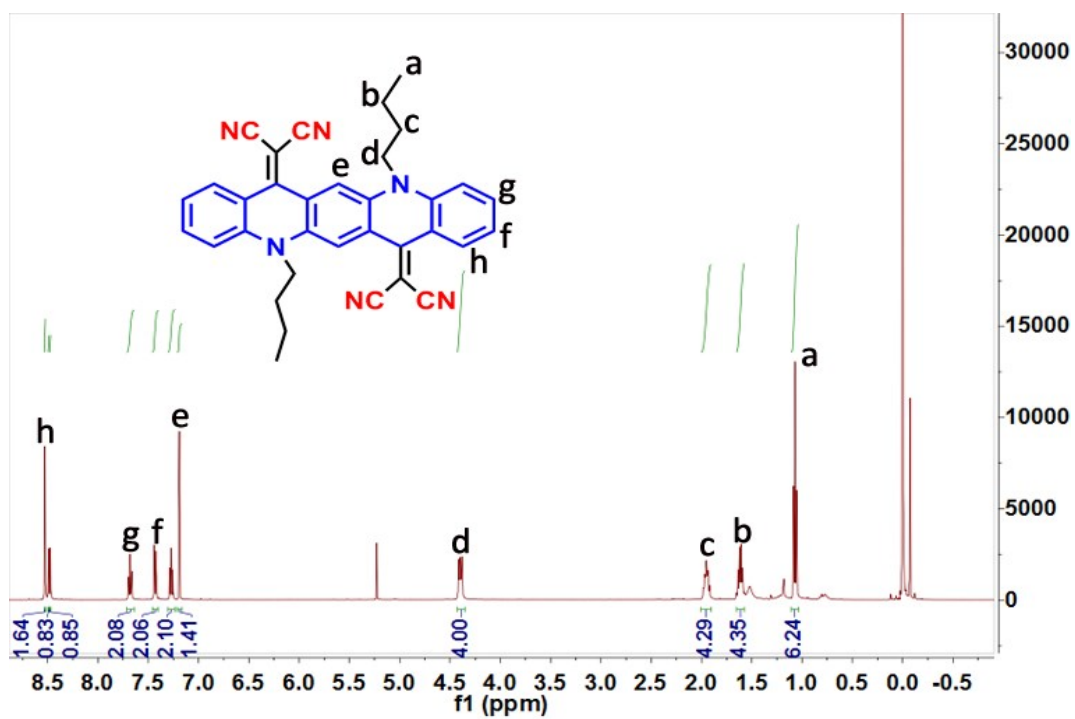

**Fig. S1** <sup>1</sup>H NMR spectrum of DCN-4CQA in CDCl<sub>3</sub>.

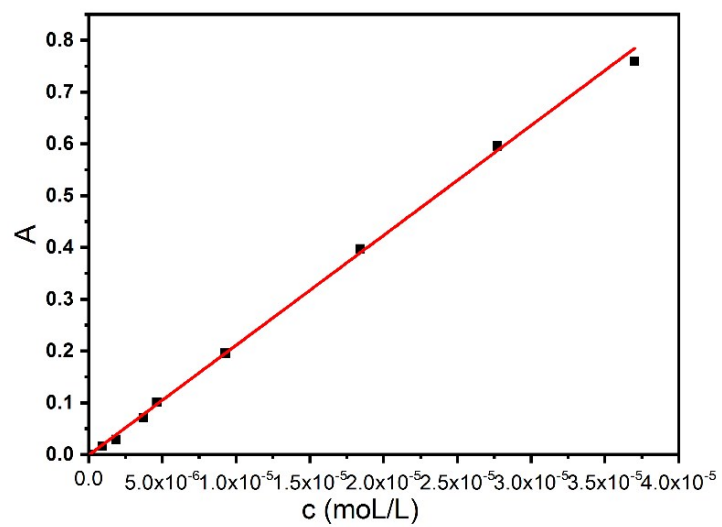

**Fig. S2** Calculation of molar absorption coefficient.

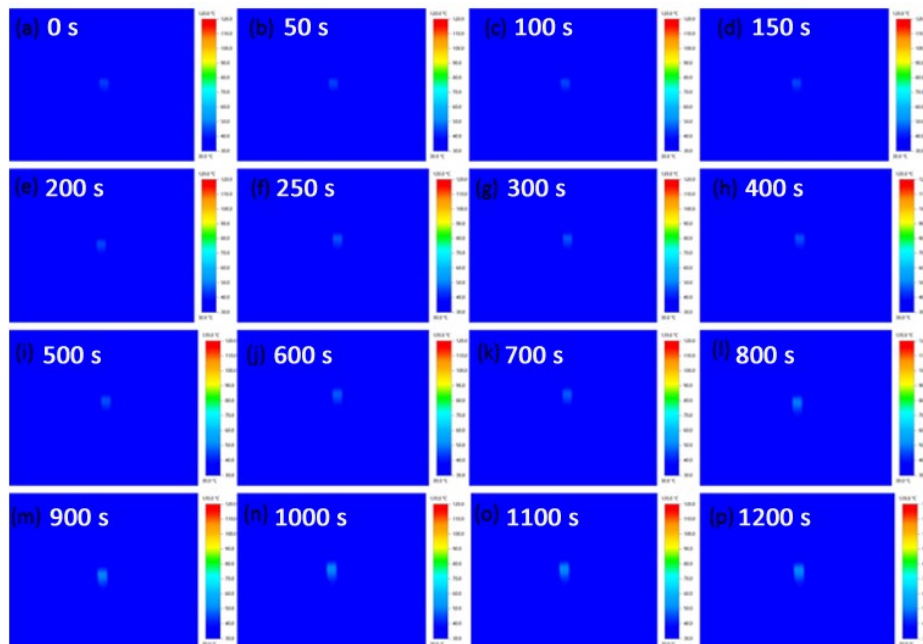

**Fig. S3** Thermal imaging of PBS under 655 nm laser irradiation (1.0 W/cm<sup>2</sup>) for different times.

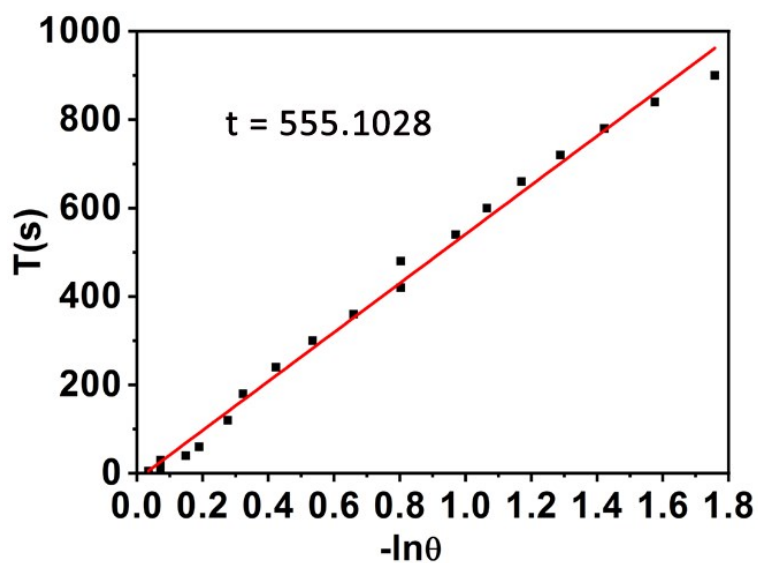

**Fig. S4** Linear time data versus  $-\ln(\theta)$  obtained from the cooling period of NIR laser off.

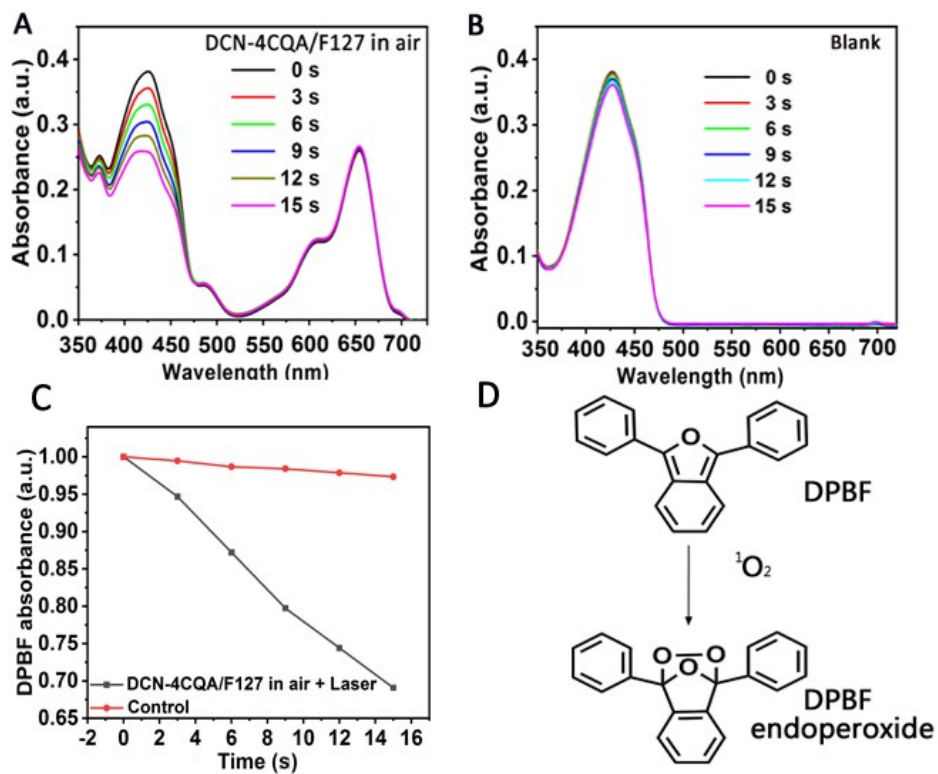

**Fig. S5** (A, B) UV-vis absorption spectra of DPBF with and without DCN-4CQA under 655 nm irradiation at 1.0 W/cm<sup>2</sup> for different time. (C) Absorption at 419 nm of DPBF with and without DCN-4CQA under 730 nm laser irradiation. (D) Illustration of the reaction from DPBF to DPBF endoperoxide by singlet oxygen.

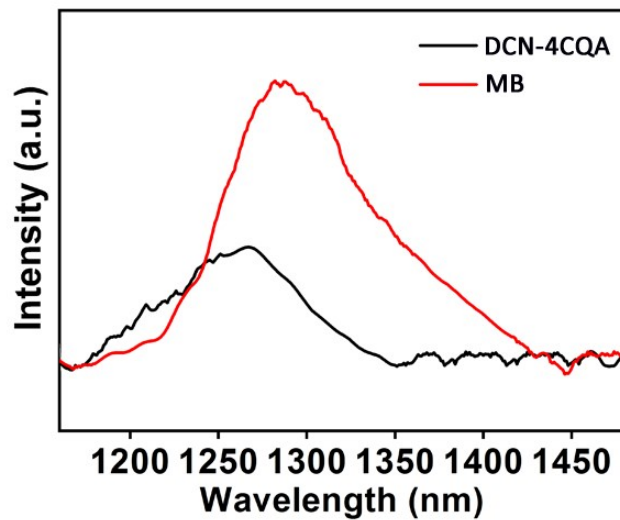

**Fig. S6**  $^1\text{O}_2$  emission at  $\sim 1270$  nm induced by the commercial MB and DCN-4CQA in ethanol under excitation with a 655 nm light.

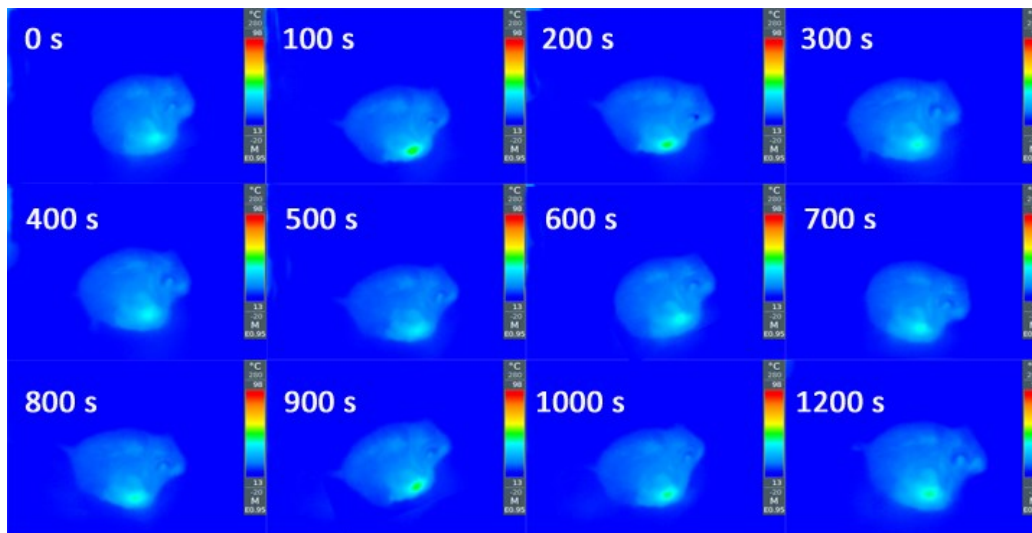

**Fig. S7** Thermal imaging of mice without any treatments under 730 nm laser irradiation for different times.

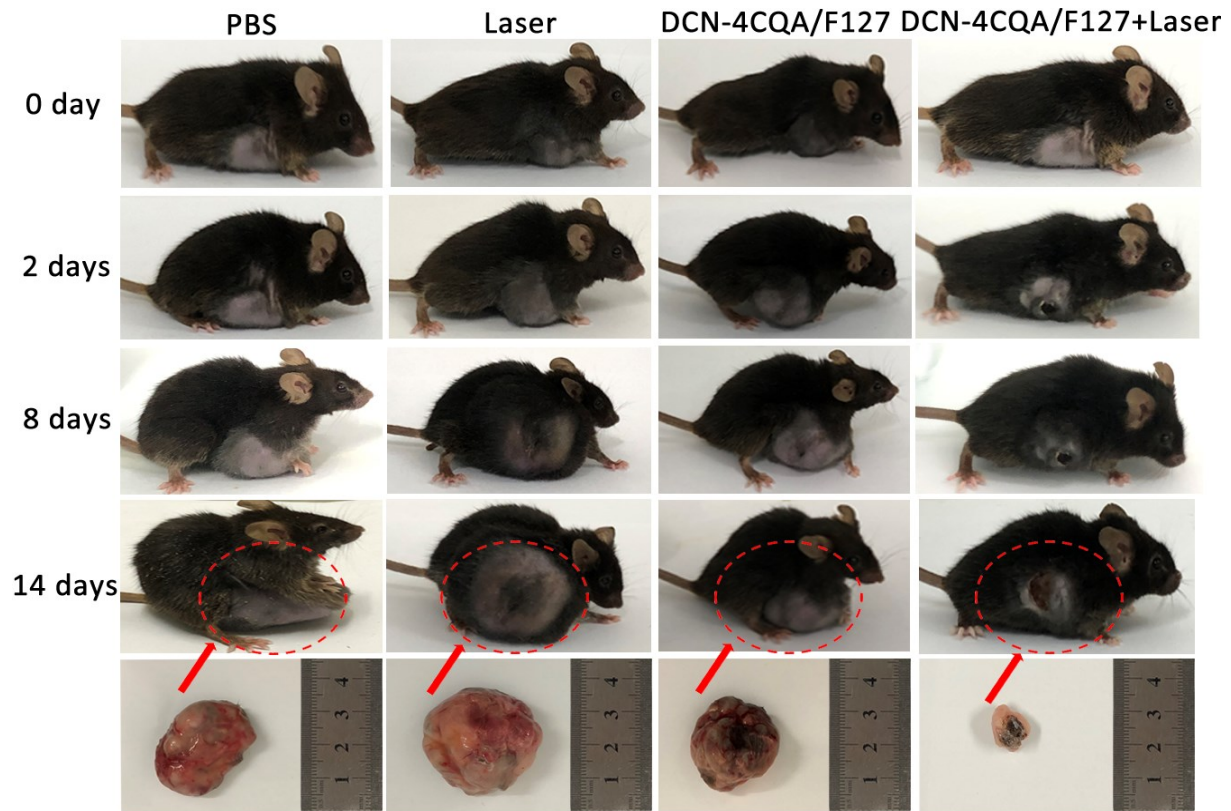

**Fig. S8** Tumor images of different groups of 4T1 tumor-bearing mice after 14-day treatment.
